# Supplementary material
Source: HighWire-hosted journal article supplement (doi:10.1101/rna.079486.122)
Supplement: Supplemental_Information.docx [file Supplemental_Information.docx]

**Supplementary information**

**to**

**Occurrences and classification of T-shaped interactions between nucleobases in RNA structures**

Zakir Ali,1 Teagan Kukhta,2 Ayush Jhunjhunwala,3 John F. Trant,2,* and Purshotam Sharma1,2,*

1Computational Biochemistry Laboratory, Department of Chemistry and Centre for Advanced Studies in Chemistry, Panjab University, Chandigarh, 160014, India.

2Department of Chemistry and Biochemistry, University of Windsor, 401 Sunset Ave. Windsor ON, N9B 3P4, Canada

3Center for Computational Natural Sciences and Bioinformatics, International Institute of Information Technology, Gachibowli, Hyderabad, Telangana, 500032, India.

*Email: j.trant@uwindsor.ca, psharma@pu.ac.in

**Comparison with parallel stacking.** For comparison, the dataset was also searched for the analogous parallel face-to-face stacking contacts using the previously developed analogous detection methodology (Jhunjhunwala et al. 2021). Owing to their general role in stabilizing RNA structures, parallel stacking interactions occurs in all RNA-containing PDB files. However, 80% of the PDB structures that involve stacking interactions do not have T-shaped interactions. Overall, the occurrence of stacking interactions is 568 times greater than T-shaped interactions (Supplemental Table S3). This correlates with the evidence that T-shaped contacts occur primarily in specific RNA regions with irregular backbone topologies (*e.g.,* loops and junctions).

Further comparison of the statistical distribution of stacking and T-shaped interactions reveals salient differences. Specifically, in terms of the preference of the constituent nucleobases, stacking interactions show reduced preference towards purine-purine combinations (45.5%) compared to T-shaped interactions (65%, Supplemental Table S16). Further, the contribution of pyrimidine-pyrimidine combinations in T-shaped interactions (8.8%) is significantly lower than stacking contacts (20.7%, Supplemental Table S16). However, in terms of the identities of the constituent bases forming the stack, the A-G combination dominates both stacking and T-shaped contacts (Supplemental Table S17). Alternatively, in terms of the glycosidic orientation, although T-shaped interactions involve significant *trans* orientation (33.2%,), stacking interactions are overwhelmingly *cis* oriented (91.7%, Supplemental Table S18). Further, although T-shaped interactions predominantly occur between *non-consecutive* nucleotides (66%), only a quarter of the stacking interactions are *non-consecutive* (Supplemental Table S14). However, due to their rarity in the structure space, *inter-RNA* contacts contribute insignificantly to the overall statistics of both stacking and T-shaped interactions. Overall, this comparison reveals that the physicochemical and structural requirements for a T-shaped interaction are different than those needed to establish parallel stacking interactions.


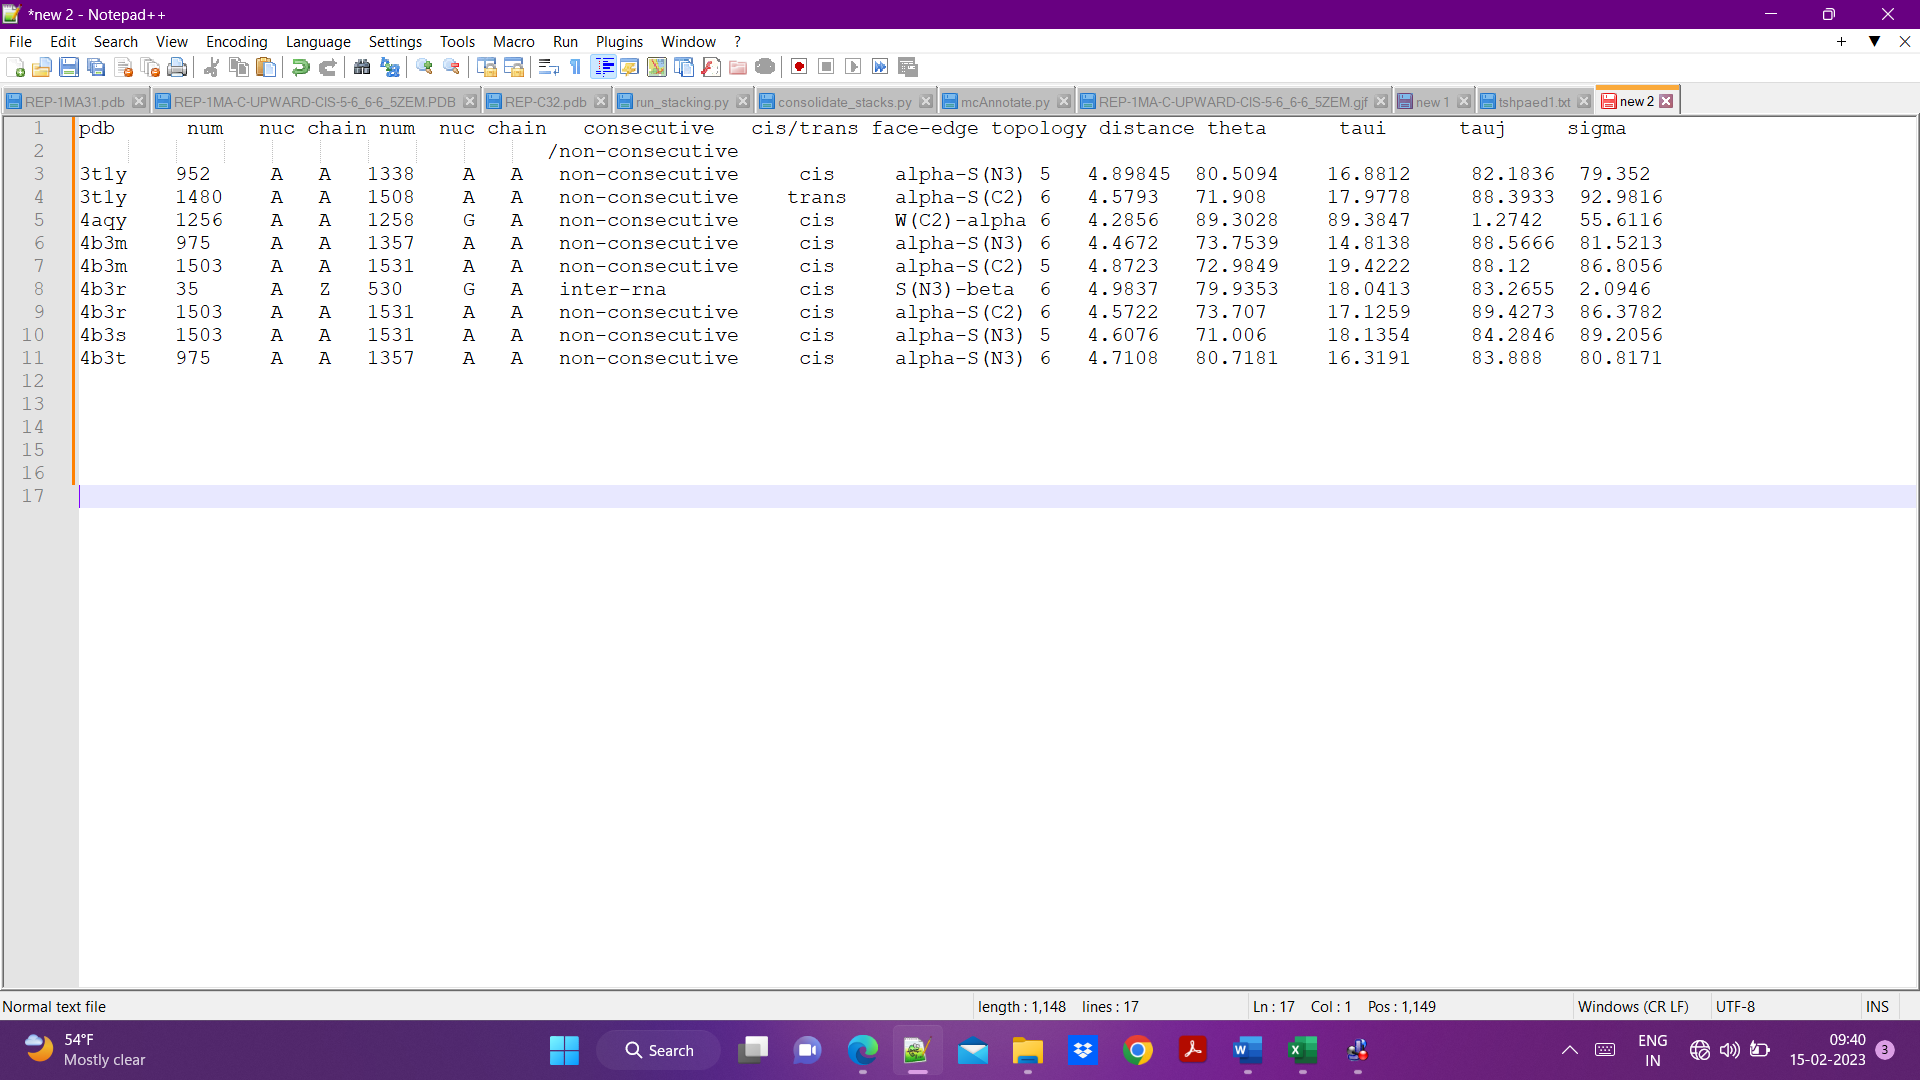
 **Figure S1.** Sample output file for the detection of T-shaped interactions in RNA PDB structures.

**

**

**Figure S2**. (A) Histograms for the distribution of T-shaped interactions with respect to vertical distance (Å), (B) tilt angle (θhv) and (C) the angles denoting the relative horizontal displacement of the rings (τh and τv).


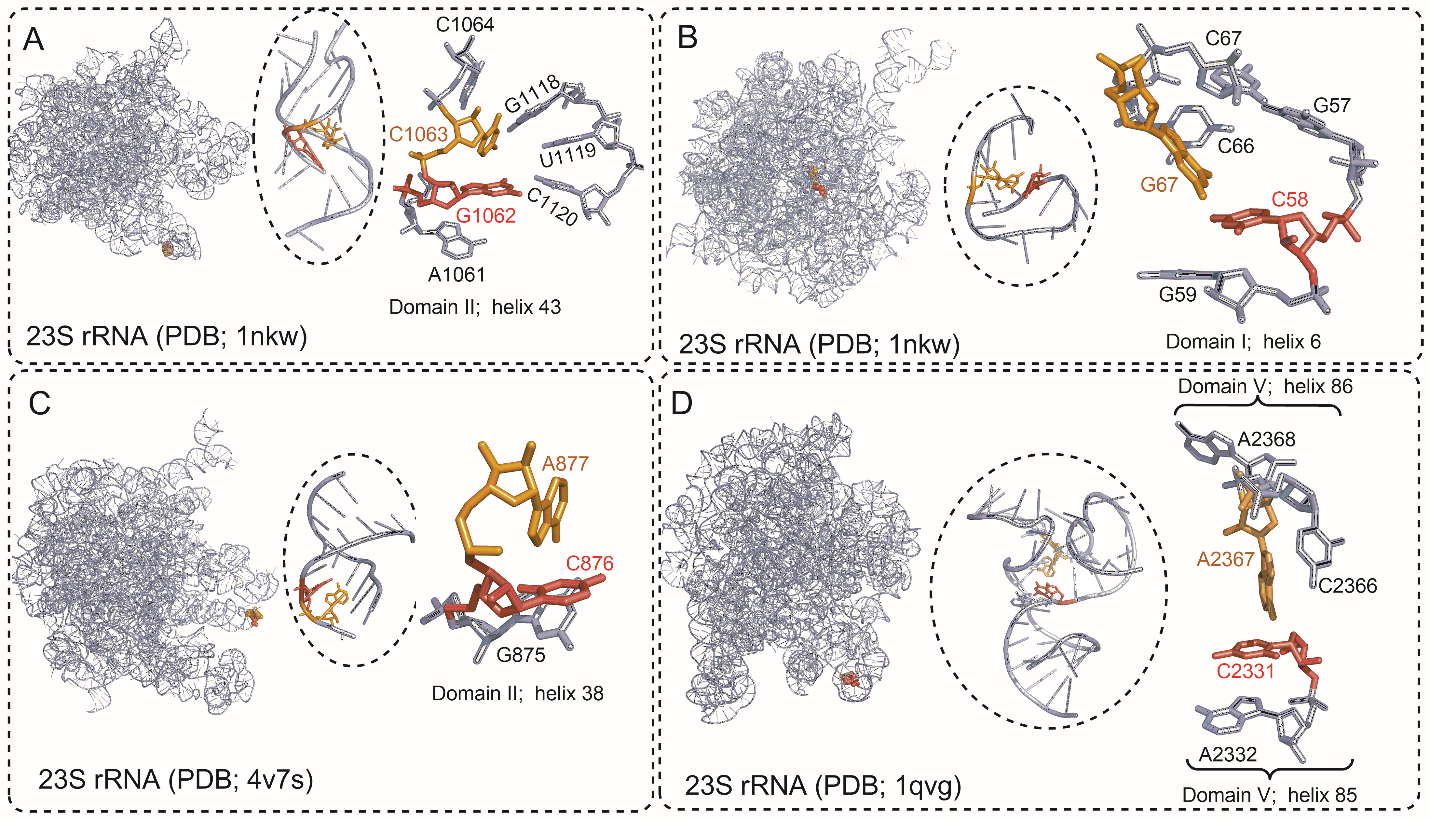


**Figure S3.** Examples of structures obtained after relaxing the cut-offs for the detection of of T-shaped interactions. (A andd B) Example structures obtained after relaxing the cut-off ( = 63° for (A) and = 61° for (B)). (C and D) Example structures obtained after relaxing the τh and τv cut-offs (τh = 27°, τv = 56° for (C) and τh = 20.7°, τv = 72° for (D).

**
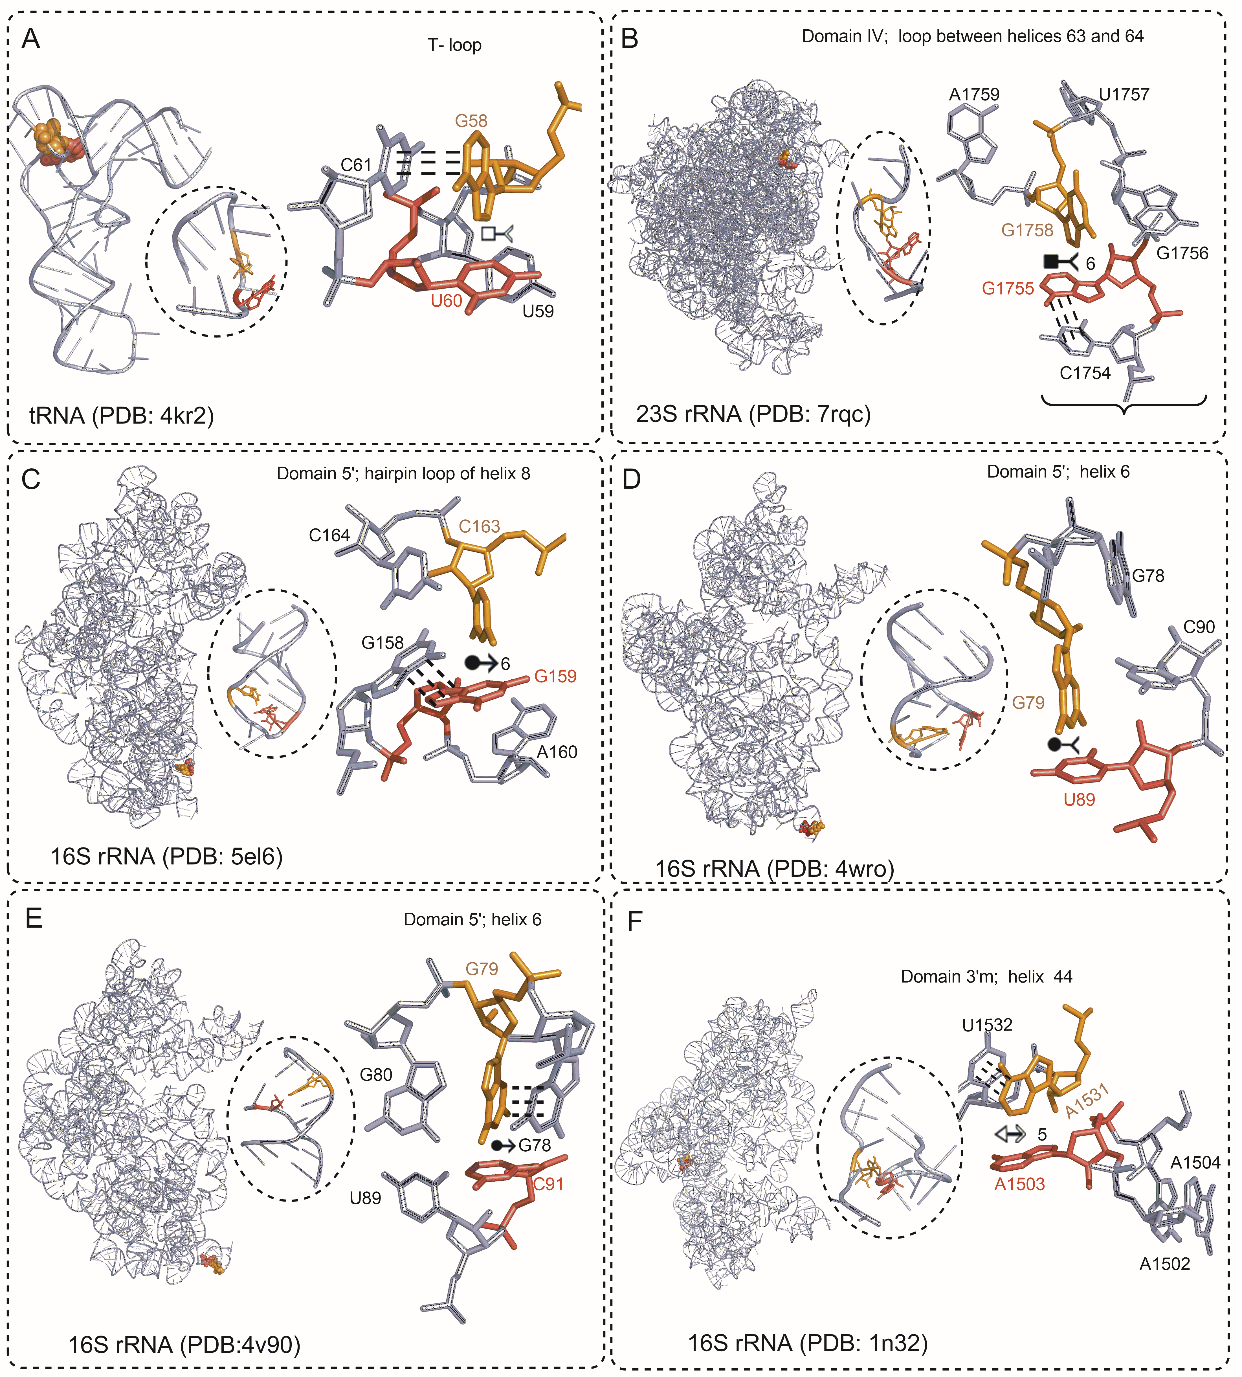
**

**Figure S4.** Examples of T-shaped interaction involving bases (red: horizontal base, orange: vertical base) within a loop or a helix (T-shaped interactions). Surrounding bases are shown in grey, and parallel stacking interactions of the surrounding bases with the horizontal and/or vertical base are shown using black dotted lines. Examples are taken from T-shaped interactions with varied inter-nucleotide separation between the interacting bases, ranging from 1 nucleotide (Fig. A), 2 nucleotides (Fig. B), 3 nucleotides (Fig. C), 9 nucleotides (Fig. D), 11 nucleotides (Fig. E) and 27 nucleotides (Fig. F). Symbolic representation is used to indicate the type of T-shaped interaction.


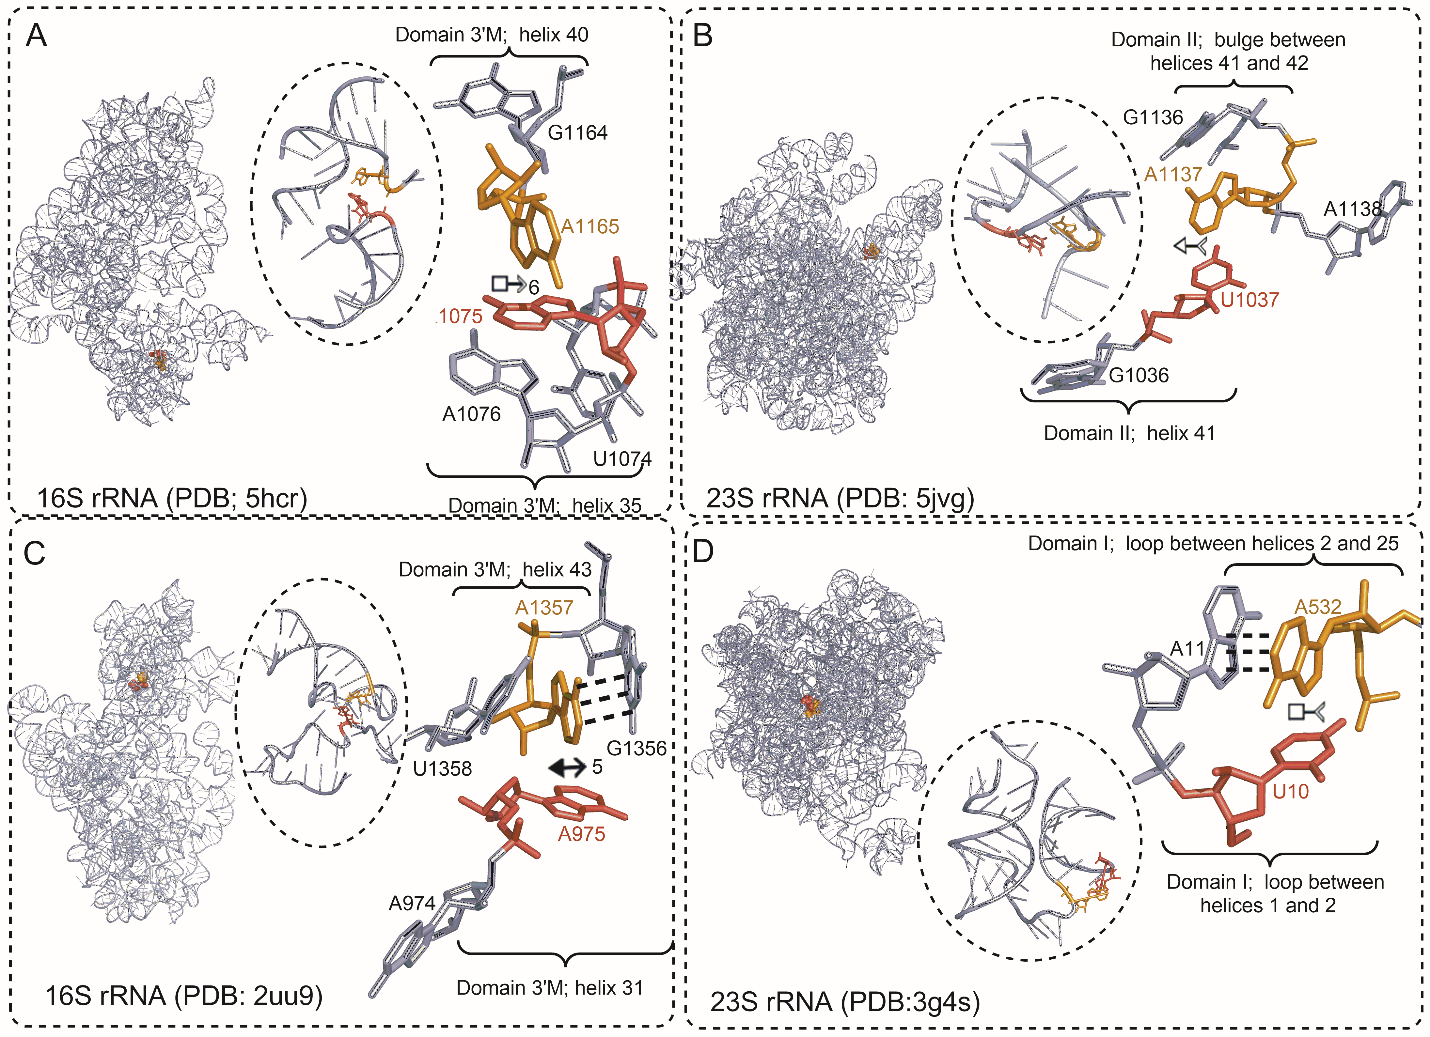


**Figure S5.** Examples of T-shaped interaction involving bases from different regions within an RNA domain. Surrounding bases are shown in grey and parallel stacking interactions of the surrounding bases with the horizontal and/or vertical base are shown using black dotted lines. Examples are taken from T-shaped interactions with varied inter-nucleotide separation between the interacting bases, ranging from 89 nucleotides (Fig. A), 100 nucleotides (Fig. B), 381 nucleotides (Fig. C) and 521 nucleotides (Fig. D). Symbolic representation is used to indicate the type of T-shaped interaction.


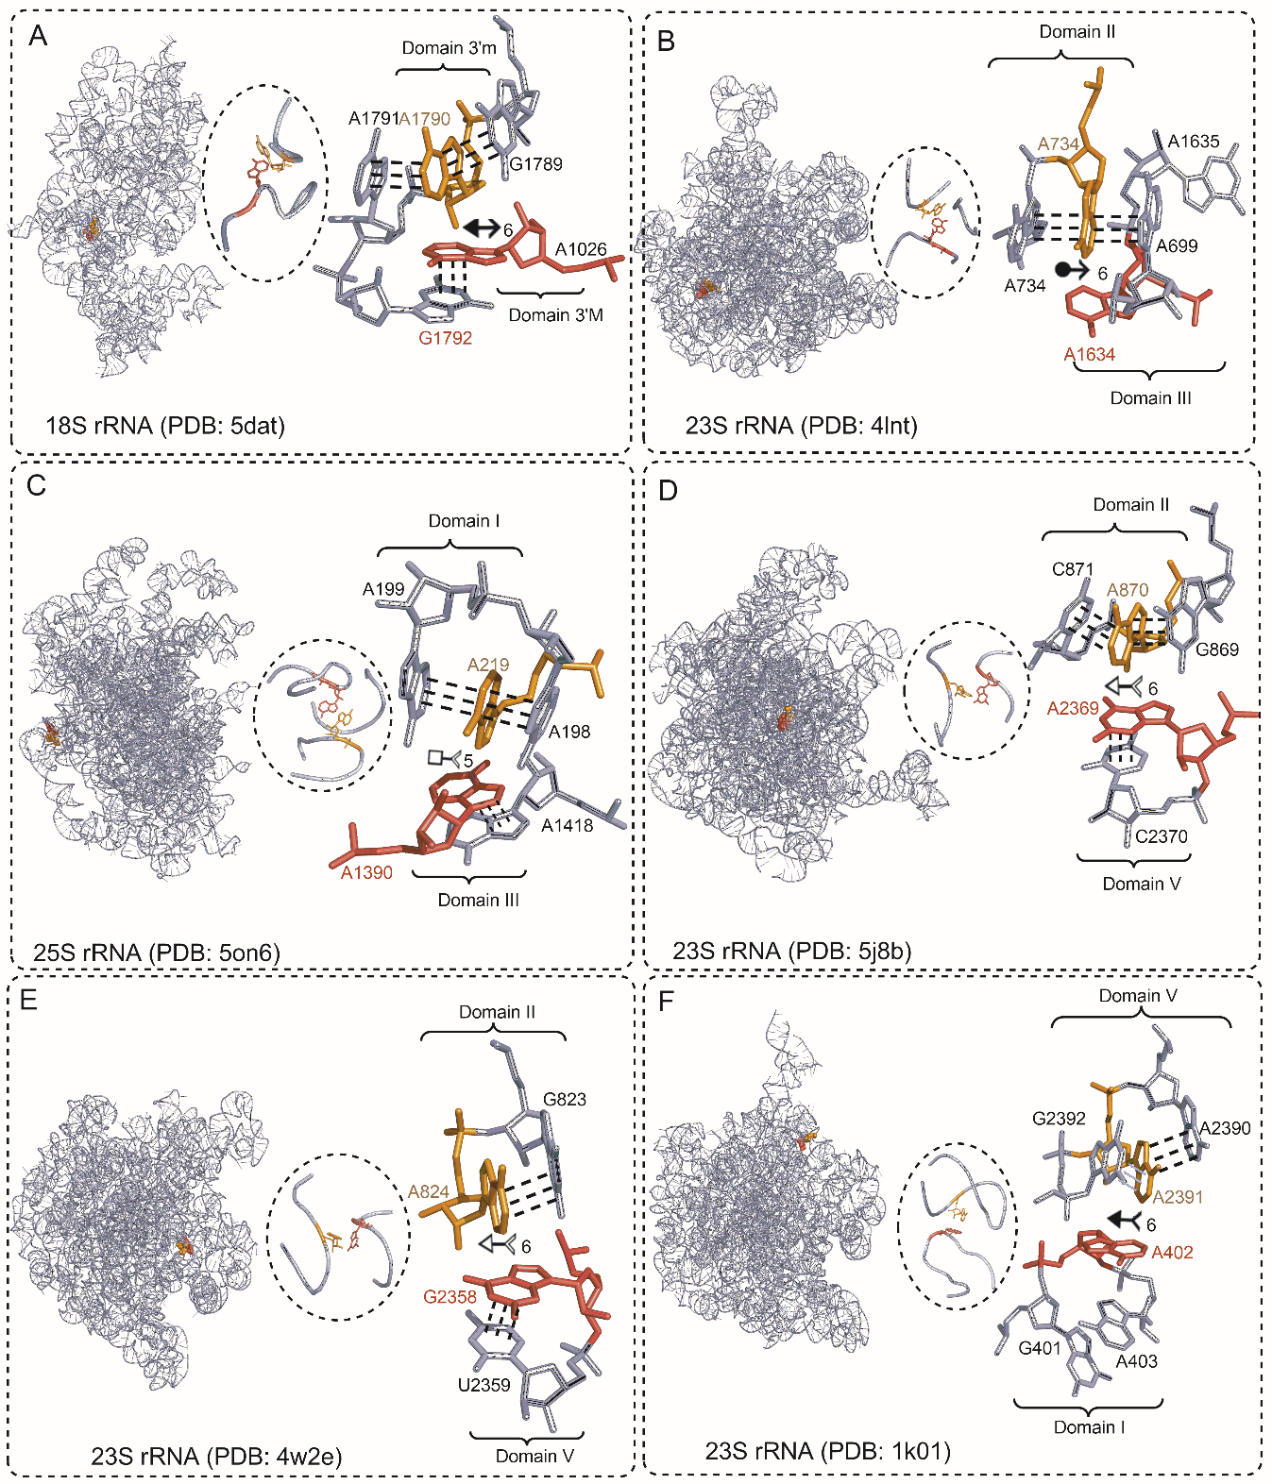


**Figure S6.** Examples of T-shaped interaction involving bases from two different RNA structural domains (inter-domain T-shaped interactions). Surrounding bases are shown in grey and parallel stackings interactions of the surrounding bases with the horizontal and/or vertical base are shown using black dotted lines. Examples are taken from T-shaped interactions with varied inter-nucleotide separation between the interacting bases, ranging from 763 nucleotides (Fig. A), 899 nucleotides (Fig. B), 1170 nucleotides (Fig. C), 1498 nucleotides (Fig. D), 1533 nucleotides (Fig. E), and 1988 nucleotides (Fig. F).





**Figure S7.** Computationally determined edge centres of each nucleobase.

**Table S1.** List of PDB codes of RNA X-ray crystal structures used in this study.

| 1a34,1a9n,1aq3,1aq4,1asy,1asz,1av6,1b23,1b2m,1b7f,1bmv,1c0a,1c9s,1cvj,1cwp,1ddl,1ddy,1dfu,1di2,1dk1,1drz,1dul,1e7k,1e8o,1ec6,1efw,1egk,1eiy,1eqq,1euq,1euy,1exd,1f1t,1f7u,1f7v,1f7y,1f8v,1feu,1ffk,1ffy,1fjg,1fka,1fxl,1g1x,1g2e,1g59,1gax,1gsg,1gtf,1gtn,1gtr,1gts,1h1k,1h2c,1h2d,1h38,1h3e,1h4q,1hc8,1hnw,1hnx,1hnz,1hq1,1hr0,1hys,1i5l,1i6h,1i6u,1i94,1ibk,1ibl,1ibm,1il2,1ivs,1j1u,1j2b,1j5a,1j5e,1jbr,1jbs,1jbt,1jid,1jj2,1jzx,1jzy,1k01,1k73,1k8a,1k8w,1k9m,1kc8,1kd1,1knz,1kog,1kq2,1kqs,1kuq,1kxk,1l2x,1l9a,1laj,1lc4,1lng,1m1k,1m5k,1m5o,1m5p,1m5v,1m8v,1m8w,1m8x,1m8y,1m90,1mfq,1mji,1mme,1mms,1msw,1mzp,1n1h,1n32,1n33,1n77,1n78,1n8r,1nb7,1nbs,1nji,1njp,1nkw,1nta,1nwx,1nwy,1o0b,1o0c,1ob2,1ob5,1ond,1ooa,1p6v,1pgl,1pvo,1q2r,1q7y,1q81,1q82,1q86,1qa6,1qf6,1qln,1qrs,1qrt,1qru,1qtq,1qvf,1qvg,1r3e,1r9f,1r9t,1rc7,1rlg,1rna,1rpu,1s03,1s0v,1s72,1s76,1s77,1sds,1ser,1si3,1sj3,1sj4,1sjf,1sm1,1t0k,1tfw,1tfy,1ttt,1u0b,1u1y,1u63,1u6b,1u9s,1un6,1urn,1utd,1uvi,1uvj,1uvl,1uvm,1uvn,1vbx,1vby,1vbz,1vc0,1vc5,1vc6,1vfg,1vq4,1vq5,1vq6,1vq7,1vq8,1vq9,1vqk,1vql,1vqm,1vqn,1vqo,1vqp,1vvj,1vy4,1vy5,1vy6,1vy7,1w2b,1wmq,1wne,1wpu,1wrq,1wsu,1wz2,1x9k,1xbp,1xjr,1xmo,1xmq,1xnq,1xnr,1xok,1xpo,1xpr,1xpu,1y26,1y27,1y39,1y69,1yfg,1yhq,1yi2,1yij,1yit,1yj9,1yjn,1yjw,1ykq,1ytu,1yty,1yvp,1yyk,1yyo,1yyw,1yz9,1zbh,1zbi,1zbl,1zdh,1zdi,1zdj,1zdk,1zh5,1zho,1zjw,1zl3,1zse,1zzn,2a1r,2a64,2a8v,2aar,2ake,2ann,2anr,2asb,2atw,2az0,2az2,2azx,2b2d,2b2e,2b2g,2b3j,2bbv,2bh2,2bny,2bq5,2bs0,2bs1,2bte,2bu1,2bx2,2byt,2c0b,2c4q,2c4y,2c4z,2c50,2c51,2cky,2csx,2ct8,2cv0,2cv1,2cv2,2czj,2d3o,2d6f,2db3,2der,2dlc,2dr2,2dr5,2dr7,2dr8,2dr9,2dra,2drb,2du3,2du4,2du5,2du6,2dvi,2dxi,2e2i,2e2j,2e5l,2e9r,2e9t,2e9z,2ec0,2ez6,2f8k,2f8s,2f8t,2fk6,2fmt,2fz2,2g4b,2g8f,2g8h,2g8i,2g8k,2g8u,2g8v,2g8w,2gic,2gje,2gjw,2gtt,2gxb,2h0s,2hhh,2ht1,2hvy,2hw8,2hyi,2i82,2i91,2il9,2ix1,2iy5,2iz8,2iz9,2izm,2izn,2j0q,2j0s,2jea,2jlu,2jlv,2jlw,2jlx,2jly,2jlz,2nqp,2nue,2nuf,2nug,2nvq,2nvt,2nz4,2o5i,2o5j,2oe5,2oeu,2ogm,2oih,2oiu,2oj3,2otj,2otl,2ozb,2pjp,2ply,2po1,2ppb,2pxb,2pxd,2pxe,2pxf,2pxk,2pxl,2pxp,2pxq,2pxt,2pxu,2pxv,2py9,2q1o,2q66,2qa4,2qbz,2qex,2qk9,2qkb,2qkk,2qus,2qux,2qwy,2r7r,2r7s,2r7t,2r7u,2r7v,2r7w,2r7x,2r7y,2r8s,2rd2,2re8,2rfk,2uu9,2uua,2uub,2uuc,2uwm,2uxb,2uxc,2uxd,2v0g,2v3c,2vnu,2vod,2von,2voo,2vop,2vpl,2vqe,2vqf,2vrt,2vum,2w2h,2wj8,2x1a,2x1f,2xb2,2xbm,2xd0,2xdb,2xdd,2xgj,2xli,2xlj,2xlk,2xnr,2xpj,2xs2,2xs5,2xs7,2xzl,2xzo,2y8w,2y8y,2y9h,2ygh,2yjy,2ykg,2yu9,2zh1,2zh2,2zh3,2zh4,2zh5,2zh6,2zh7,2zh8,2zh9,2zha,2zhb,2zi0,2zjq,2zjr,2zko,2zm5,2zm6,2zni,2zue,2zuf,2zxu,2zy6,2zzm,2zzn,387d,3a3a,3a6p,3adb,3adc,3add,3adi,3adl,3aev,3af6,3agv,3ahu,3akz,3al0,3am1,3amt,3amu,3avt,3b0u,3b58,3bnq,3bo2,3bo3,3bo4,3boy,3bsb,3bsn,3bso,3bsu,3bsx,3bt7,3bx2,3bx3,3cc2,3cc4,3cc7,3cce,3ccj,3ccl,3ccm,3ccq,3ccr,3ccs,3ccu,3ccv,3cd6,3cf5,3cgp,3ciy,3cma,3cme,3cpw,3cul,3cun,3cxc,3cz3,3d2s,3dd2,3dh3,3dig,3dll,3e2e,3e5c,3egz,3eph,3eqt,3er9,3erc,3ex7,3f2q,3f73,3fht,3foz,3fte,3fu2,3g0h,3g4s,3g6e,3g71,3g8s,3g8t,3g96,3g9c,3g9y,3gca,3gib,3gpq,3gs5,3gtj,3gtl,3h5x,3h5y,3hax,3hhn,3hhz,3hjw,3hl2,3hou,3hov,3hoy,3hsb,3htx,3i55,3i56,3i5x,3i5y,3i61,3i62,3iab,3ice,3icq,3ie1,3iem,3iev,3irw,3ivk,3ivn,3iwn,3k0j,3k49,3k4e,3k5q,3k5y,3k5z,3k61,3k62,3k64,3kfu,3klv,3kmq,3kms,3kna,3koa,3ks8,3ktw,3l25,3l26,3l3c,3lqx,3lrn,3lrr,3lwo,3lwp,3lwq,3lwr,3lwv,3m3y,3m7n,3m85,3mdg,3mdi,3mj0,3moj,3mqk,3mum,3mur,3mut,3muv,3mxh,3ncu,3ndb,3nkb,3nl0,3nma,3nmr,3nmu,3nna,3nnc,3nnh,3npn,3nvi,3nvk,3o3i,3o6e,3o7v,3o8c,3o8r,3og8,3oij,3oin,3ok2,3ok4,3ol6,3ol7,3ol8,3ol9,3ola,3olb,3ouy,3ov7,3ova,3ovb,3ovs,3ow2,3owi,3p6y,3pew,3pey,3pf4,3pf5,3pio,3pip,3pkm,3pla,3po2,3po3,3ptx,3pu0,3pu1,3pu4,3q0l,3q0m,3q0n,3q0o,3q0p,3q0q,3q0r,3q0s,3q2t,3q3z,3qg9,3qgb,3qgc,3qjj,3qjl,3qjp,3qrp,3qrr,3qsu,3qsy,3r1h,3r1l,3r2c,3r2d,3r4f,3r9w,3r9x,3rc8,3rer,3rtj,3rw6,3rzd,3rzo,3s14,3s15,3s16,3s17,3s1m,3s1n,3s1q,3s1r,3s2d,3s2h,3sd3,3siu,3siv,3ski,3sn2,3snp,3sqw,3sqx,3suh,3t1h,3t1y,3t3n,3t3o,3t5n,3t5q,3trz,3ts0,3ts2,3tup,3twh,3u2e,3u4m,3u56,3ucu,3ucz,3ud3,3ud4,3uld,3umy,3uzt,3v6y,3v71,3v74,3v7e,3vjr,3vrs,3vyx,3vyy,3w3s,3wbm,3wfr,3wfs,3wqy,3wzi,3x1l,3zc0,3zd6,3zd7,3zgz,3zjt,3zju,3zjv,3zla,430d,4a3b,4a3c,4a3d,4a3e,4a3f,4a3g,4a3k,4a3l,4a93,4afy,4al5,4al6,4al7,4alp,4am3,4ang,4aq7,4aqy,4arc,4ari,4as1,4ato,4ay2,4b3g,4b3m,4b3o,4b3r,4b3s,4b3t,4ba2,4bhh,4boc,4bpb,4bw0,4bwm,4bxx,4by7,4c4w,4c7o,4c8y,4c8z,4c9d,4cqn,4csf,4d25,4d26,4db2,4dr2,4dr3,4dr5,4dr6,4duy,4dv6,4dv7,4dwa,4dzs,4e78,4ed5,4ejt,4erd,4eya,4f02,4f1n,4f3t,4frn,4fsj,4ftb,4fte,4fts,4fvu,4fxd,4g0a,4g7o,4g9z,4gg4,4gha,4ghl,4gkj,4gkk,4gv3,4gv6,4gv9,4gxy,4gzy,4h5p,4h8k,4hkq,4hor,4hos,4hot,4ht8,4ht9,4i67,4ifd,4ig8,4ii9,4ijs,4ill,4ilm,4io9,4ioa,4iqx,4j1g,4j39,4j50,4j5v,4j7l,4j7m,4jf2,4jgn,4ji0,4ji1,4ji3,4ji7,4jk0,4jng,4jnx,4jv5,4jvh,4jvy,4jxx,4jxz,4jya,4jyz,4jzu,4jzv,4k0k,4k27,4k4s,4k4t,4k4u,4k4v,4k4w,4k4x,4k4y,4k4z,4k50,4khp,4kji,4knq,4kq0,4kqy,4kr2,4kr3,4kr6,4kr7,4kr9,4ktg,4kxt,4kzd,4kze,4l47,4l8h,4l8r,4lck,4lf4,4lf6,4lf7,4lf8,4lf9,4lfb,4lg2,4lgt,4lj0,4lmz,4lnt,4lq3,4lsk,4lt8,4m2z,4m30,4m4o,4m59,4m6d,4m7a,4m7d,4mdx,4meg,4mgn,4n0t,4n2q,4n48,4ngb,4ngc,4ngd,4ngf,4ngg,4nh3,4nh5,4nh6,4nha,4nia,4nku,4nl3,4o26,4o8j,4oau,4oe1,4ohy,4ohz,4oi0,4oi1,4oji,4ol8,4ola,4olb,4oo1,4oo8,4oog,4oq8,4oq9,4oqu,4p3e,4p95,4pdb,4peh,4pei,4phy,4pjo,4pkd,4pmi,4pmw,4pqu,4pqv,4pr6,4prf,4puo,4pwd,4py5,4q0b,4q5s,4q5v,4q9q,4q9r,4qei,4qg3,4qi2,4qik,4qil,4qjd,4qjh,4qk9,4qlm,4qm6,4qoz,4qpx,4qqb,4qu6,4qu7,4qvc,4qvd,4qvi,4qyz,4r3i,4r4p,4r8i,4rbq,4rcj,4rcm,4rdx,4rge,4rmo,4rqf,4rum,4rwn,4rwo,4rwp,4rzd,4s2x,4s2y,4s3n,4ts0,4tu0,4tua,4tue,4tuw,4tux,4tv0,4tvx,4tyw,4tyy,4tz0,4tz6,4u1u,4u1v,4u20,4u24,4u25,4u26,4u27,4u3m,4u3n,4u3u,4u4n,4u4q,4u4r,4u4u,4u4y,4u4z,4u50,4u51,4u52,4u53,4u55,4u56,4u6f,4u7u,4u8t,4un3,4un4,4un5,4uyj,4uyk,4v2s,4v4f,4v4h,4v4q,4v50,4v51,4v52,4v54,4v57,4v5a,4v5c,4v5d,4v5e,4v5j,4v5k,4v5l,4v5p,4v5q,4v5r,4v5s,4v63,4v64,4v67,4v6a,4v6c,4v6f,4v6g,4v7j,4v7l,4v7m,4v7s,4v7t,4v7u,4v7v,4v7w,4v7x,4v7y,4v7z,4v83,4v84,4v85,4v87,4v88,4v8a,4v8b,4v8c,4v8d,4v8e,4v8f,4v8g,4v8h,4v8i,4v8n,4v8q,4v8x,4v90,4v95,4v97,4v99,4v9a,4v9b,4v9c,4v9d,4v9e,4v9f,4v9h,4v9i,4v9k,4v9l,4v9n,4v9o,4v9p,4v9q,4v9r,4v9s,4w2e,4w2f,4w2g,4w2h,4w2i,4w4g,4w5n,4w5o,4w5q,4w5r,4w5t,4w90,4w92,4wal,4wan,4wc2,4wc3,4wc4,4wc5,4wc6,4wc7,4wf1,4wf9,4wfa,4wfb,4wfl,4wj4,4wkr,4woi,4wpo,4wq1,4wqf,4wqr,4wqu,4wqy,4wr6,4wra,4wro,4wrt,4wsa,4wsb,4wsd,4wsm,4wt1,4wt8,4wti,4wu1,4www,4wzd,4wzm,4wzo,4wzq,4x0a,4x0b,4x2b,4x4n,4x4o,4x4p,4x4q,4x4r,4x4s,4x4t,4x4u,4x4v,4x62,4x64,4x65,4x66,4x9e,4xbf,4xco,4xjn,4xw7,4xww,4y1m,4y4o,4y4p,4y52,4y7n,4y91,4yaz,4yb1,4ybb,4yco,4yhh,4yhw,4yoe,4ypb,4yvi,4yvj,4yvk,4yye,4yzv,4z0c,4z31,4z3s,4z4c,4z4d,4z4e,4z4f,4z4g,4z4h,4z4i,4z7l,4z8c,4z92,4zc7,4zdo,4zdp,4zer,4zld,4zlr,4znp,4zt0,4zt9,5a0t,5a0v,5ah5,5amq,5amr,5aor,5aox,5axm,5axn,5axw,5b2o,5b2q,5b2r,5b2s,5b2t,5b43,5b63,5bjo,5bkl,5bkn,5br8,5bs3,5bte,5btm,5btp,5bud,5bym,5bz1,5bz5,5bzu,5bzv,5c0y,5c3e,5c5w,5c9h,5ccb,5ccx,5cd4,5cki,5czp,5czz,5d0a,5d0b,5d6g,5d8h,5dar,5dat,5dc3,5dcv,5ddo,5ddp,5ddq,5ddr,5de5,5de8,5dea,5det,5dfe,5dge,5dgf,5dgv,5dh6,5dm6,5dm7,5dno,5do4,5do5,5dox,5doy,5dto,5dv7,5e08,5e17,5e18,5e3h,5e6m,5e7k,5e81,5eao,5ed1,5ed2,5eeu,5eev,5eew,5eex,5eey,5eez,5ef0,5ef1,5ef2,5ef3,5eim,5el4,5el5,5el6,5el7,5elh,5elk,5elr,5els,5elt,5elx,5emo,5en1,5ex7,5f0q,5f0s,5f5f,5f5h,5f6c,5f8g,5f8h,5f8i,5f8j,5f8k,5f8l,5f8m,5f8n,5f98,5f9f,5f9h,5f9r,5fci,5fcj,5fdu,5fdv,5fj4,5fmz,5fq5,5fw1,5fw2,5fw3,5g4u,5g4v,5gin,5gip,5gmf,5gmg,5guh,5gxh,5gxi,5h1k,5h1l,5h3u,5h9e,5h9f,5hab,5hau,5hc9,5hcp,5hcq,5hcr,5hd1,5hjz,5hk0,5hkc,5ho4,5hp2,5hp3,5hr6,5hr7,5hsw,5i4a,5i4l,5i9d,5i9f,5i9g,5i9h,5ib7,5ib8,5ibb,5ip2,5it8,5iwa,5j01,5j30,5j3c,5j4b,5j4c,5j4d,5j5b,5j7l,5j88,5j8a,5j8b,5j91,5jaj,5jb2,5jbg,5jc3,5jc7,5jc9,5jcf,5jch,5jea,5jji,5jjk,5jjl,5jju,5jrc,5js1,5js2,5jvg,5jxs,5k36,5k77,5k78,5kal,5ki6,5kk5,5kla,5kpy,5krg,5l2l,5lm7,5lta,5lyb,5lyu,5m0h,5m0i,5m0j,5m3h,5m3j,5m73,5mei,5mfx,5mga,5mjv,5msf,5mwi,5n94,5ndj,5ndk,5ndv,5ng6,5npm,5nrg,5ns3,5ns4,5nwq,5o1y,5o1z,5o3j,5o58,5o6u,5o7h,5ob3,5obm,5oc6,5omw,5on2,5on3,5on6,5onh,5ot2,5sup,5swm,5sze,5t16,5t7b,5t83,5t8y,5tbw,5tf6,5tga,5tgm,5the,5tpy,5tsn,5u30,5u31,5u34,5u3g,5ud5,5udi,5udj,5udk,5udl,5udz,5uk4,5une,5us2,5usa,5use,5usg,5ux0,5ux3,5v3f,5v6x,5v7c,5v8i,5vaj,5vi5,5vm9,5vo8,5voe,5vof,5vp2,5vpo,5vsu,5vw1,5vzj,5w0m,5w1h,5w1i,5w3v,5w4k,5w51,5w5h,5w5i,5w6v,5w7n,5w7o,5wea,5wis,5wit,5wjr,5wlh,5wnp,5wnq,5wnr,5wns,5wnt,5wnu,5wnv,5wqe,5ws2,5wt1,5wt3,5wti,5wtk,5wty,5wwe,5wwf,5wwg,5wwr,5wws,5wwt,5www,5wwx,5wzg,5wzh,5wzi,5wzj,5wzk,5x21,5x22,5x2g,5x2h,5x6b,5x70,5xbl,5xc6,5xh6,5xh7,5xj2,5xog,5xus,5xwp,5y58,5y6z,5y7m,5y85,5yki,5yts,5ytt,5ytv,5ytx,5yyn,5z4a,5z4d,5z4j,5z98,5z9x,5zc9,5zkj,5zq0,5zq1,5zq8,5zsa,5zsb,5zsc,5zsd,5zse,5zsl,5zsm,5zsn,5zth,5ztm,5zuu,5zw4,5zx2,6a4e,6a6j,6a6l,6aax,6aay,6aeb,6aeg,6ai6,6ajk,6ar1,6ar3,6aso,6b0b,6b14,6b3k,6b4v,6bbo,6bjg,6bjh,6bjv,6bjy,6blo,6blp,6bm2,6bm4,6boh,6bqf,6bsg,6bsh,6bsi,6bsj,6buw,6bz6,6c5l,6c63,6c6k,6cae,6cao,6cap,6caq,6car,6cas,6cb3,6cbd,6cf2,6cfj,6cfk,6cfl,6ck4,6cmn,6cu1,6cyt,6czr,6d06,6d12,6d1v,6d2z,6d30,6d3p,6d8a,6db8,6db9,6dcb,6dcc,6dcl,6dlq,6dmc,6dmn,6dmv,6do8,6do9,6doa,6dob,6doc,6dod,6doe,6dof,6dog,6doh,6doi,6doj,6dok,6dol,6dom,6don,6doo,6dop,6doq,6dor,6dos,6dot,6dou,6dov,6dow,6dox,6doy,6doz,6dp0,6dp1,6dp2,6dp3,6dp4,6dp5,6dp6,6dp7,6dp8,6dp9,6dpa,6dpb,6dpc,6dpd,6dpe,6dpf,6dpg,6dph,6dpi,6dpj,6dpk,6dpl,6dpm,6dpn,6dpo,6dpp,6dt8,6dta,6dtd,6du4,6du5,6dvc,6dvk,6e0o,6e4p,6e8s,6een,6evk,6f3h,6f4g,6f4h,6fhh,6fhi,6fkr,6fpq,6fpx,6fq3,6fql,6fqr,6fz0,6g2k,6g3b,6gc5,6gd2,6gd3,6gpg,6gsj,6gsk,6gsl,6gvy,6gx6,6h0r,6h9h,6h9i,6hau,6hct,6hhq,6htu,6hyu,6i0t,6i0u,6i0v,6i1k,6i1l,6i3p,6i7v,6ia2,6ifn,6ifo,6ij2,6is0,6iv8,6iv9,6j7z,6jcx,6jcy,6jdq,6jdv,6je3,6je4,6je9,6jfu,6jim,6joo,6jq5,6jvx,6jxm,6k3z,6k4p,6k4q,6k4s,6k4u,6k57,6kc7,6kc8,6kon,6koo,6kop,6koq,6kqd,6kqe,6kqf,6kqg,6kqh,6kql,6kqm,6kqn,6kr6,6ktc,6kug,6kwq,6kwr,6kyv,6l1w,6l5n,6l74,6las,6lau,6lax,6laz,6lkq,6llb,6lse,6lsf,6lsg,6lsh,6lt7,6ltp,6ltr,6ltu,6lu0,6lvr,6m0v,6m0w,6m0x,6m6r,6m6s,6m6v,6m75,6m7k,6mdz,6mfn,6mj0,6mkn,6mpf,6mpi,6msf,6mwn,6n1d,6n2v,6n4o,6n5q,6n6a,6n6c,6n6d,6n6e,6n6f,6n6g,6n6h,6n6i,6n6j,6n6k,6nd5,6nd6,6noc,6nod,6nof,6noh,6nsh,6nta,6nuo,6nwy,6ny5,6o16,6o5f,6o6v,6o6x,6o75,6o78,6o79,6o7b,6o97,6of1,6of6,6oj2,6ol3,6oon,6ope,6ord,6otr,6ov0,6ovr,6ovy,6ow3,6oxa,6oxi,6oy5,6oy6,6oy7,6ozp,6ozs,6p2h,6p71,6p7p,6p7q,6pmo,6ppn,6ppp,6ppq,6ppv,6pun,6pzq,6q1h,6q8u,6qcv,6qcw,6qcx,6qn3,6qnq,6qnr,6r47,6r7b,6r9j,6r9m,6r9o,6r9p,6r9q,6r9r,6ra4,6rcl,6rt4,6rt5,6rt6,6rt7,6rti,6s0m,6sce,6scf,6sjd,6sqn,6sqq,6sty,6svs,6sx0,6sx2,6sy4,6sy6,6tb7,6tqa,6tqb,6tyg,6u6y,6u8d,6u8k,6u9x,6ucq,6uej,6ufg,6ufh,6ufj,6uo1,6upx,6upy,6upz,6uq2,6uq3,6utv,6uv1,6uv2,6uv3,6uv4,6v9b,6vff,6vm6,6vmy,6vrd,6w11,6wan,6wbr,6wox,6woy,6wpi,6wre,6wxq,6wxx,6wxy,6wyb,6x1b,6x5m,6x5n,6xbu,6xh0,6xh1,6xh2,6xh3,6xhv,6xhw,6xhx,6xhy,6xjq,6xjw,6xjy,6xjz,6xki,6xl1,6xlv,6xlw,6xlx,6xqd,6xqe,6yft,6yl5,6yrb,6yrq,6yud,6ywo,6yym,6zdp,6zdq,6zdu,6zlc,6zm2,6zot,6zww,7a0r,7a0s,7a18,7a9w,7a9x,7bah,7bai,7bdv,7c06,7c07,7c08,7c45,7cgf,7cgg,7cgh,7cgi,7cgj,7cgk,7cgl,7cgm,7d2l,7d3j,7d7v,7d81,7d8o,7dic,7did,7dlz,7dol,7dug,7duh,7dui,7duj,7duk,7dul,7dwh,7e8o,7eh0,7eh1,7eh2,7eiu,7el1,7elp,7eni,7eoh,7eu9,7f36,7jju,7jnh,7jql,7jqm,7jrr,7jrs,7jrt,7jyy,7jz0,7k16,7k5l,7k98,7k9d,7k9e,7k9m,7k9y,7ka0,7kab,7kee,7kfn,7kga,7ki3,7kjt,7kkv,7kl3,7kqm,7kqn,7kvt,7l6r,7l6t,7lh5,7lyf,7lyj,7m2t,7m2v,7m3t,7m50,7md7,7mjv,7mjw,7mjx,7mjy,7mlw,7mlx,7mpl,7mpm,7mpn,7mpq,7mpu,7mrl,7msf,7mw8,7n2m,7ndj,7njc,7nq4,7o0g,7oa3,7ofw,7ofz,7og0,7om6,7om7,7oma,7os0,7osa,7osm,7ox8,7ox9,7ozq,7p0v,7po6,7q7x,7r9f,7r9g,7rex,7rim,7rip,7riq,7riw,7rix,7rq8,7rq9,7rqa,7rqb,7rqc,7rqd,7rqe,7rzz,7s02,7s3a,7s3b,7s3c,7tqb,7v4g,7v9e,7vnv,7wkv,7wl0,7z26,7z42,7z43,7z4o |
| --- |

**Table S2.** List of atoms/groups considered for assigning the interacting edge of the vertical base in T-shaped interactions.

| **BASES** | **Edge** | **Non-protonated atoms** | **Protonated atoms** |
| --- | --- | --- | --- |
| A | W edge | N1 | N6, C2 |
| H edge | N7 | C8, N6 |
| S edge | N3 | C2 |
| G | W edge | O6 | N1, N2 |
| H edge | O6, N7 | C8 |
| S edge | N3 | N2 |
| C | W edge | O2, N3 | N4 |
| H edge | – | N4, C5, C6 |
| S edge | O2 | – |
| U | W edge | O2, O4 | N3 |
| H edge | O4 | C5, C6 |
| S edge | O2 | – |

**Table S3.** List of PDB codes of RNA X-ray crystal structures with identified T-shaped interactions.

| 1ddy,1ffk,1fjg,1fka,1hnw,1hnx,1hnz,1i94,1ibk,1ibl,1ibm,1j5a,1j5e,1jj2,1jzx,1jzy,1k01,1k73,1k8a,1k9m,1kc8,1kd1,1kqs,1m1k,1m90,1n32,1n33,1n8r,1nji,1njp,1nkw,1nwx,1nwy,1ond,1q7y,1q81,1q82,1q86,1qvf,1qvg,1s72,1sm1,1tfy,1vq4,1vq5,1vq6,1vq7,1vq8,1vq9,1vqk,1vql,1vqm,1vqn,1vqo,1vqp,1vvj,1vy4,1vy5,1vy6,1vy7,1w2b,1xbp,1xmo,1xmq,1xnq,1xnr,1y69,1yhq,1yi2,1yij,1yit,1yj9,1yjn,1yjw,1zzn,2aar,2bx2,2d3o,2dr2,2e5l,2gtt,2hhh,2il9,2ogm,2otj,2otl,2qa4,2qex,2uu9,2uua,2uub,2uuc,2uxb,2uxc,2uxd,2vqe,2vqf,2xd0,2xdd,2zjq,2zm6,3bo3,3bo4,3cc2,3cc4,3cc7,3cce,3ccj,3ccl,3ccm,3ccq,3ccr,3ccs,3ccu,3ccv,3cd6,3cf5,3cma,3cme,3cpw,3cxc,3dll,3g4s,3g6e,3g71,3i55,3ow2,3pio,3pip,3qsy,3t1h,3t1y,4aqy,4b3m,4b3r,4b3s,4b3t,4dr2,4dr3,4dr5,4dr6,4duy,4dv6,4gkj,4gkk,4ijs,4io9,4ioa,4ji0,4ji1,4ji3,4ji7,4jv5,4jya,4k0k,4khp,4kr2,4l47,4lf4,4lf6,4lf7,4lf8,4lf9,4lfb,4lnt,4lsk,4lt8,4m6d,4n2q,4p95,4tua,4tue,4tz0,4u1u,4u1v,4u20,4u24,4u25,4u26,4u27,4u3m,4u3n,4u3u,4u4n,4u4q,4u4r,4u4u,4u4y,4u4z,4u50,4u51,4u52,4u53,4u55,4u56,4u6f,4v4h,4v4q,4v50,4v51,4v52,4v54,4v57,4v5a,4v5c,4v5d,4v5e,4v5j,4v5k,4v5l,4v5p,4v5q,4v5r,4v5s,4v63,4v64,4v67,4v6a,4v6c,4v6f,4v6g,4v7j,4v7l,4v7m,4v7s,4v7t,4v7u,4v7v,4v7w,4v7x,4v7y,4v7z,4v83,4v84,4v85,4v87,4v88,4v8a,4v8b,4v8c,4v8d,4v8e,4v8f,4v8g,4v8h,4v8i,4v8n,4v8q,4v8x,4v90,4v95,4v97,4v9a,4v9b,4v9c,4v9d,4v9f,4v9h,4v9i,4v9k,4v9l,4v9n,4v9o,4v9p,4v9q,4v9r,4v9s,4w2e,4w2f,4w2g,4w2h,4w2i,4w4g,4wf1,4wf9,4wfa,4wfb,4woi,4wpo,4wq1,4wqf,4wqr,4wqu,4wqy,4wr6,4wra,4wro,4wsd,4wsm,4wt1,4wt8,4wu1,4www,4wzd,4wzo,4x62,4x64,4x65,4x66,4y4o,4y4p,4ybb,4yhh,4ypb,4yzv,4z3s,4z8c,4zer,5bkn,5br8,5czp,5dat,5dc3,5dfe,5dge,5dgf,5dgv,5dm6,5dm7,5dox,5doy,5e7k,5E81,5el4,5el5,5el6,5el7,5f8k,5fci,5fcj,5fdu,5fdv,5hau,5hcp,5hcq,5hcr,5hd1,5i4l,5ib7,5ib8,5ibb,5it8,5iwa,5j30,5j3c,5j4b,5j4c,5j4d,5j5b,5j7l,5j88,5j8a,5j8b,5j91,5jc9,5jea,5jvg,5lyb,5mei,5ndj,5ndk,5ndv,5nrg,5obm,5on6,5tbw,5tga,5tgm,5v8i,5vp2,5vpo,5w4k,5wis,5wit,5wnp,5wnq,5wnr,5wns,5wnt,5wnu,5wnv,5wti,6b4v,6boh,6buw,6bz6,6c5l,6cae,6cao,6cap,6caq,6car,6cas,6cfj,6cfk,6cfl,6czr,6fkr,6gsj,6gsk,6gsl,6hhq,6i7v,6ifo,6lkq,6mkn,6mpf,6mpi,6mwn,6n1d,6nd5,6nd6,6nsh,6nta,6nuo,6nwy,6o97,6of1,6of6,6oj2,6ope,6ord,6otr,6oxa,6oxi,6qnq,6qnr,6ucq,6uo1,6xhv,6xhw,6xhx,6xhy,6xqd,6xqe,6zww,7a0r,7a0s,7a18,7jql,7jqm,7lh5,7m3t,7md7,7osa,7osm,7rq8,7rq9,7rqa,7rqb,7rqc,7rqd,7rqe |
| --- |

**Table S4.** Comparison of the total number of PDB files, and the files having T-shaped interactions in the dataset of 2286 RNA structures.

| **Interaction Type** | **Count** |
| --- | --- |
| Total Number of PDB files | 2286 |
| PDB Files Having T-shaped Interactions | 453 |

**Table S5.** Distribution of different sequence combinations of T-shaped interactions in terms of the interacting face of the horizontal base.

| **Sequence Combination**  **(Horizontal Base - Vertical Base)** | **All Interactions** | | | | **Nonredundant Interactions** | | | |
| --- | --- | --- | --- | --- | --- | --- | --- | --- |
| **a** | | **b** | | **A** | | **b** | |
| **Count** | **%** | **Count** | % | **Count** | **%** | **Count** | % |
| A-A | 479 | 14.7 | 348 | 10.7 | 105 | 11.4 | 83 | 9.0 |
| A-C | 47 | 1.4 | 45 | 1.4 | 19 | 2.1 | 20 | 2.2 |
| A-G | 23 | 0.7 | 342 | 10.5 | 16 | 1.7 | 43 | 4.7 |
| A-U | 34 | 1.0 | 59 | 1.8 | 18 | 2.0 | 28 | 3.0 |
| C-A | 165 | 5.1 | 83 | 2.5 | 40 | 4.3 | 29 | 3.1 |
| C-C | 21 | 0.6 | 41 | 1.3 | 14 | 1.5 | 30 | 3.3 |
| C-G | 26 | 0.8 | 29 | 0.9 | 13 | 1.4 | 18 | 2.0 |
| C-U | 24 | 0.7 | 53 | 1.6 | 13 | 1.4 | 17 | 1.8 |
| G-A | 297 | 9.1 | 535 | 16.4 | 69 | 7.5 | 56 | 6.1 |
| G-C | 65 | 2.0 | 17 | 0.5 | 35 | 3.8 | 13 | 1.4 |
| G-G | 26 | 0.8 | 82 | 2.5 | 20 | 2.2 | 43 | 4.7 |
| G-U | 12 | 0.4 | 55 | 1.7 | 10 | 1.1 | 29 | 3.1 |
| U-A | 53 | 1.6 | 119 | 3.6 | 22 | 2.4 | 31 | 3.4 |
| U-C | 28 | 0.9 | 54 | 1.7 | 12 | 1.3 | 24 | 2.6 |
| U-G | 5 | 0.2 | 31 | 1.0 | 4 | 0.4 | 16 | 1.7 |
| U-U | 26 | 0.8 | 37 | 1.1 | 12 | 1.3 | 20 | 2.2 |
| **Total** | **1331** | | **1930** | | **422** | | **500** | |
| **%** | **40.8%** | | **59.2%** | | **45.8%** | | **54.2%** | |

**Table S6.** Distribution of different sequence combinations of T-shaped interactions in terms of the interacting ring(s) of the horizontal base.

| **Sequence Combination**  **(Horizontal Base - Vertical Base)** | **All Interactions** | | | | | | **Nonredundant Interactions** | | | | | |
| --- | --- | --- | --- | --- | --- | --- | --- | --- | --- | --- | --- | --- |
| **5** | | **6** | | **56** | | **5** | | **6** | | **56** | |
| **Count** | **%** | **Count** | **%** | **Count** | **%** | **Count** | **%** | **Count** | **%** | **Count** | **%** |
| A-A | 511 | 15.7 | 311 | 9.5 | 5 | 0.2 | 102 | 11.1 | 81 | 8.8 | 5 | 0.5 |
| A-C | 64 | 2.0 | 23 | 0.7 | 5 | 0.2 | 26 | 2.8 | 10 | 1.1 | 3 | 0.3 |
| A-G | 53 | 1.6 | 312 | 9.6 | 0 | 0.0 | 26 | 2.8 | 33 | 3.6 | 0 | 0.0 |
| A-U | 37 | 1.1 | 54 | 1.7 | 2 | 0.1 | 21 | 2.3 | 24 | 2.6 | 1 | 0.1 |
| C-A | − | − | 248 | 7.6 | − | − | – | – | 69 | 7.5 | – | – |
| C-C | − | − | 62 | 1.9 | − | − | – | – | 44 | 4.8 | – | – |
| C-G | − | − | 55 | 1.7 | − | − | – | – | 31 | 3.4 | – | – |
| C-U | − | − | 77 | 2.4 | − | − | – | – | 30 | 3.3 | – | – |
| G-A | 523 | 16 | 291 | 8.9 | 18 | 0.6 | 65 | 7.0 | 51 | 5.5 | 9 | 1.0 |
| G-C | 37 | 1.1 | 42 | 1.3 | 3 | 0.1 | 17 | 1.8 | 29 | 3.1 | 2 | 0.2 |
| G-G | 44 | 1.3 | 62 | 1.9 | 2 | 0.1 | 26 | 2.8 | 35 | 3.8 | 2 | 0.2 |
| G-U | 27 | 0.8 | 40 | 1.2 | 0 | 0.0 | 15 | 1.6 | 24 | 2.6 | 0 | 0.0 |
| U-A | − | − | 172 | 5.3 | − | − | – | – | 53 | 5.7 | – | – |
| U-C | − | − | 82 | 2.5 | − | − | – | – | 36 | 3.9 | – | – |
| U-G | − | − | 36 | 1.1 | − | − | – | – | 20 | 2.2 | – | – |
| U-U | − | − | 63 | 1.9 | − | − | – | – | 32 | 3.5 | – | – |
| **Total** | **1296** | | **1928** | | **35** | | **298** | | **602** | | **22** | |
| **%** | **39.7%** | | **59.2%** | | **1.1%** | | **32.3%** | | **65.3%** | | **2.4%** | |

**Table S7.** Distribution of different sequence combinations of T-shaped interactions in terms of the interacting edge of the vertical base.

| **Sequence Combination**  **(Horizontal Base - Vertical Base)** | **All Interactions** | | | | | | **Nonredundant Interactions** | | | | | |
| --- | --- | --- | --- | --- | --- | --- | --- | --- | --- | --- | --- | --- |
| **W** | | **S** | | **H** | | **W** | | **S** | | **H** | |
| **Count** | **%** | **Count** | **%** | **Count** | **%** | **Count** | **%** | **Count** | **%** | **Count** | **%** |
| A-A | 110 | 3.4 | 558 | 17.1 | 159 | 4.9 | 32 | 3.5 | 78 | 8.5 | 78 | 8.5 |
| A-C | 23 | 0.7 | 0 | 0.0 | 69 | 2.1 | 10 | 1.1 | 0 | 0.0 | 29 | 3.1 |
| A-G | 9 | 0.3 | 25 | 0.8 | 331 | 10.2 | 6 | 0.7 | 12 | 1.3 | 41 | 4.4 |
| A-U | 38 | 1.2 | 0 | 0.0 | 55 | 1.7 | 23 | 2.5 | 0 | 0.0 | 23 | 2.5 |
| C-A | 119 | 3.6 | 72 | 2.2 | 57 | 1.7 | 22 | 2.4 | 19 | 2.1 | 28 | 3.0 |
| C-C | 3 | 0.1 | 1 | 0.0 | 58 | 1.8 | 3 | 0.3 | 1 | 0.1 | 40 | 4.3 |
| C-G | 14 | 0.4 | 6 | 0.2 | 35 | 1.1 | 11 | 1.2 | 2 | 0.2 | 18 | 2.0 |
| C-U | 7 | 0.2 | 0 | 0.0 | 70 | 2.1 | 6 | 0.7 | 0 | 0.0 | 24 | 2.6 |
| G-A | 49 | 1.5 | 538 | 16.5 | 245 | 7.5 | 23 | 2.5 | 48 | 5.2 | 54 | 5.9 |
| G-C | 35 | 1.1 | 1 | 0.0 | 46 | 1.4 | 24 | 2.6 | 1 | 0.1 | 23 | 2.5 |
| G-G | 15 | 0.5 | 18 | 0.6 | 75 | 2.3 | 10 | 1.1 | 12 | 1.3 | 41 | 4.4 |
| G-U | 10 | 0.3 | 0 | 0.0 | 57 | 1.7 | 8 | 0.9 | 0 | 0.0 | 31 | 3.4 |
| U-A | 20 | 0.6 | 62 | 1.9 | 90 | 2.8 | 12 | 1.3 | 21 | 2.3 | 20 | 2.2 |
| U-C | 20 | 0.6 | 0 | 0.0 | 62 | 1.9 | 11 | 1.2 | 0 | 0.0 | 25 | 2.7 |
| U-G | 3 | 0.1 | 3 | 0.1 | 30 | 0.9 | 2 | 0.2 | 2 | 0.2 | 16 | 1.7 |
| U-U | 18 | 0.6 | 0 | 0.0 | 45 | 1.4 | 8 | 0.9 | 0 | 0.0 | 24 | 2.6 |
| **Total** | **493** | | **1284** | | **1484** | | **211** | | **196** | | **515** | |
| **%** | **15.1%** | | **39.4%** | | **45.5%** | | **22.9%** | | **21.3%** | | **55.9%** | |

**Table 8.** occurrences of different edges involved in T-shaped interactions.

| **BASE** | **EDGE** | **All Interactions** | | **Nonredundant Interactions** | |
| --- | --- | --- | --- | --- | --- |
| **COUNT** | **%** | **COUNT** | **%** |
| A | N3 | 958 | **46.08%** | 111 | **25.4%** |
| C2 | 482 | **23.18%** | 110 | **25.2%** |
| N7 | 375 | **18.04%** | 121 | **27.7%** |
| C8 | 158 | **7.60%** | 45 | **10.3%** |
| N1 | 84 | **4.04%** | 31 | **7.1%** |
| N6 | 22 | **1.06%** | 19 | **4.3%** |
|  |  |  |  |  |  |
| G | C8 | 314 | **55.67%** | 31 | **17.9%** |
| N7 | 150 | **26.60%** | 78 | **45.1%** |
| N2 | 36 | **6.38%** | 21 | **12.1%** |
| N1 | 29 | **5.14%** | 21 | **12.1%** |
| N3 | 23 | **4.08%** | 13 | **7.5%** |
| O6 | 12 | **2.13%** | 9 | **5.2%** |
|  |  |  |  |  |  |
| C | C5 | 176 | **55.35%** | 94 | **56.3%** |
| N3 | 55 | **17.30%** | 55 | **18.0%** |
| N4 | 44 | **13.84%** | 21 | **12.6%** |
| C6 | 28 | **8.81%** | 10 | **6.0%** |
| O2 | 15 | **4.72%** | 12 | **7.2%** |
|  |  |  |  |  |  |
| U | C5 | 176 | **58.67%** | 79 | **53.7%** |
| N3 | 37 | **12.33%** | 24 | **16.3%** |
| C6 | 33 | **11.00%** | 11 | **7.5%** |
| O4 | 29 | **9.67%** | 17 | **11.6%** |
| O2 | 25 | **8.33%** | 16 | **10.9%** |

**Table S9.** Distribution of different sequence combinations of T-shaped interactions in terms of the relative glycosidic orientation of the interacting nucleotides.

| **Sequence Combination**  **(Horizontal Base - Vertical Base)** | **All Interactions** | | | | **Nonredundant Interactions** | | | |
| --- | --- | --- | --- | --- | --- | --- | --- | --- |
| ***cis*** | | ***trans*** | | ***cis*** | | ***trans*** | |
| **Count** | **%** | **Count** | **%** | **Count** | **%** | **Count** | % |
| A-A | 560 | 17.2 | 267 | 8.2 | 110 | 11.9 | 78 | 8.5 |
| A-C | 72 | 2.2 | 20 | 0.6 | 35 | 3.8 | 4 | 0.4 |
| A-G | 338 | 10.4 | 27 | 0.8 | 45 | 4.9 | 14 | 1.5 |
| A-U | 58 | 1.8 | 35 | 1.1 | 27 | 2.9 | 19 | 2.1 |
| C-A | 158 | 4.8 | 90 | 2.8 | 54 | 5.9 | 15 | 1.6 |
| C-C | 57 | 1.7 | 5 | 0.2 | 40 | 4.3 | 4 | 0.4 |
| C-G | 40 | 1.2 | 15 | 0.5 | 27 | 2.9 | 4 | 0.4 |
| C-U | 67 | 2.1 | 10 | 0.3 | 25 | 2.7 | 5 | 0.5 |
| G-A | 404 | 12.4 | 428 | 13.1 | 84 | 9.1 | 41 | 4.4 |
| G-C | 64 | 2.0 | 18 | 0.6 | 38 | 4.1 | 10 | 1.1 |
| G-G | 97 | 3.0 | 11 | 0.3 | 54 | 5.9 | 9 | 1.0 |
| G-U | 55 | 1.7 | 13 | 0.4 | 32 | 3.5 | 7 | 0.8 |
| U-A | 61 | 1.9 | 111 | 3.4 | 30 | 3.3 | 23 | 2.5 |
| U-C | 77 | 2.4 | 5 | 0.2 | 32 | 3.5 | 4 | 0.4 |
| U-G | 22 | 0.7 | 14 | 0.4 | 16 | 1.7 | 4 | 0.4 |
| U-U | 47 | 1.4 | 15 | 0.5 | 26 | 2.8 | 6 | 0.7 |
| **Total** | **2177** | | **1084** | | **675** | | **247** | |
| **%** | **66.8%** | | **33.2%** | | **73.2%** | | **26.8%** | |

**Table S10.** Distribution of T-shaped interactions in terms of the identities of the horizontal and vertical bases.

|  | **All Interactions** | | **Nonredundant Interactions** | |
| --- | --- | --- | --- | --- |
| **Horizontal Base** | **Count** | **%** | **Count** | **%** |
| A | 1377 | 42.2 | 332 | 36.0 |
| C | 442 | 13.6 | 174 | 18.9 |
| G | 1089 | 33.4 | 275 | 29.8 |
| U | 353 | 10.8 | 141 | 15.3 |
| **Vertical base** | **Count** | **%** | **Count** | **%** |
| A | 2079 | 63.8 | 435 | 47.2 |
| C | 318 | 9.8 | 167 | 18.1 |
| G | 564 | 17.3 | 173 | 18.8 |
| U | 300 | 9.2 | 147 | 15.9 |

**Table S11.** Occurrence of total 144 geometrical possibilities of purine||purine T-shaped stacks in the dataset of RNA crystal structures.

| **Geometric combination** | **Count** | **%** |
| --- | --- | --- |
| A-A 5 aW *cis* | 4 | 0.2 |
| A-A 5 aW *trans* | 5 | 0.2 |
| A-A 6 aW *cis* | 4 | 0.2 |
| A-A 6 aW *trans* | 10 | 0.5 |
| A-A 56 aW *cis* | 0 | 0.0 |
| A-A 56 aW *trans* | 1 | 0.0 |
| A-A 5 aH *cis* | 15 | 0.7 |
| A-A 5 aH *trans* | 47 | 2.2 |
| A-A 6 aH *cis* | 7 | 0.3 |
| A-A 6 aH *trans* | 8 | 0.4 |
| A-A 56 aH *cis* | 2 | 0.1 |
| A-A 56 aH *trans* | 1 | 0.0 |
| A-A 5 aS *cis* | 251 | 11.8 |
| A-A 5 aS *trans* | 31 | 1.5 |
| A-A 6 aS *cis* | 73 | 3.4 |
| A-A 6 aS *trans* | 20 | 0.9 |
| A-A 56 aS *cis* | 0 | 0.0 |
| A-A 56 aS *trans* | 0 | 0.0 |
| A-A 5 bW *cis* | 5 | 0.2 |
| A-A 5 bW *trans* | 2 | 0.1 |
| A-A 6 bW *cis* | 75 | 3.5 |
| A-A 6 bW *trans* | 4 | 0.2 |
| A-A 56 bW *cis* | 0 | 0.0 |
| A-A 56 bW *trans* | 0 | 0.0 |
| A-A 5 bH *cis* | 36 | 1.7 |
| A-A 5 bH *trans* | 9 | 0.4 |
| A-A 6 bH *cis* | 30 | 1.4 |
| A-A 6 bH *trans* | 4 | 0.2 |
| A-A 56 bH *cis* | 0 | 0.0 |
| A-A 56 bH *trans* | 0 | 0.0 |
| A-A 5 bS *cis* | 8 | 0.4 |
| A-A 5 bS *trans* | 98 | 4.6 |
| A-A 6 bS *cis* | 49 | 2.3 |
| A-A 6 bS *trans* | 27 | 1.3 |
| A-A 56 bS *cis* | 1 | 0.0 |
| A-A 56 bS *trans* | 0 | 0.0 |
| A-G 5 aW *cis* | 6 | 0.3 |
| A-G 5 aW *trans* | 0 | 0.0 |
| A-G 6 aW *cis* | 1 | 0.0 |
| A-G 6 aW *trans* | 0 | 0.0 |
| A-G 56 aW *cis* | 0 | 0.0 |
| A-G 56 aW *trans* | 0 | 0.0 |
| A-G 5 aH *cis* | 6 | 0.3 |
| A-G 5 aH *trans* | 1 | 0.0 |
| A-G 6 aH *cis* | 3 | 0.1 |
| A-G 6 aH *trans* | 0 | 0.0 |
| A-G 56 aH *cis* | 0 | 0.0 |
| A-G 56 aH *trans* | 0 | 0.0 |
| A-G 5 aS *cis* | 0 | 0.0 |
| A-G 5 aS *trans* | 0 | 0.0 |
| A-G 6 aS *cis* | 0 | 0.0 |
| A-G 6 aS *trans* | 6 | 0.3 |
| A-G 56 aS *cis* | 0 | 0.0 |
| A-G 56 aS *trans* | 0 | 0.0 |
| A-G 5 bW *cis* | 0 | 0.0 |
| A-G 5 bW *trans* | 0 | 0.0 |
| A-G 6 bW *cis* | 1 | 0.0 |
| A-G 6 bW *trans* | 1 | 0.0 |
| A-G 56 bW *cis* | 0 | 0.0 |
| A-G 56 bW *trans* | 0 | 0.0 |
| A-G 5 bH *cis* | 39 | 1.8 |
| A-G 5 bH *trans* | 1 | 0.0 |
| A-G 6 bH *cis* | 281 | 13.2 |
| A-G 6 bH *trans* | 0 | 0.0 |
| A-G 56 bH *cis* | 0 | 0.0 |
| A-G 56 bH *trans* | 0 | 0.0 |
| A-G 5 bS *cis* | 0 | 0.0 |
| A-G 5 bS *trans* | 0 | 0.0 |
| A-G 6 bS *cis* | 1 | 0.0 |
| A-G 6 bS *trans* | 18 | 0.8 |
| A-G 56 bS *cis* | 0 | 0.0 |
| A-G 56 bS *trans* | 0 | 0.0 |
| G-A 5 aW *cis* | 2 | 0.1 |
| G-A 5 aW *trans* | 8 | 0.4 |
| G-A 6 aW *cis* | 13 | 0.6 |
| G-A 6 aW *trans* | 0 | 0.0 |
| G-A 56 aW *cis* | 1 | 0.0 |
| G-A 56 aW *trans* | 0 | 0.0 |
| G-A 5 aH *cis* | 67 | 3.1 |
| G-A 5 aH *trans* | 8 | 0.4 |
| G-A 6 aH *cis* | 28 | 1.3 |
| G-A 6 aH *trans* | 10 | 0.5 |
| G-A 56 aH *cis* | 3 | 0.1 |
| G-A 56 aH *trans* | 0 | 0.0 |
| G-A 5 aS *cis* | 67 | 3.1 |
| G-A 5 aS *trans* | 0 | 0.0 |
| G-A 6 aS *cis* | 23 | 1.1 |
| G-A 6 aS *trans* | 62 | 2.9 |
| G-A 56 aS *cis* | 5 | 0.2 |
| G-A 56 aS *trans* | 0 | 0.0 |
| G-A 5 bW *cis* | 3 | 0.1 |
| G-A 5 bW *trans* | 2 | 0.1 |
| G-A 6 bW *cis* | 13 | 0.6 |
| G-A 6 bW *trans* | 6 | 0.3 |
| G-A 56 bW *cis* | 0 | 0.0 |
| G-A 56 bW *trans* | 1 | 0.0 |
| G-A 5 bH *cis* | 105 | 4.9 |
| G-A 5 bH *trans* | 4 | 0.2 |
| G-A 6 bH *cis* | 9 | 0.4 |
| G-A 6 bH *trans* | 11 | 0.5 |
| G-A 56 bH *cis* | 0 | 0.0 |
| G-A 56 bH *trans* | 0 | 0.0 |
| G-A 5 bS *cis* | 6 | 0.3 |
| G-A 5 bS *trans* | 251 | 11.8 |
| G-A 6 bS *cis* | 59 | 2.8 |
| G-A 6 bS *trans* | 57 | 2.7 |
| G-A 56 bS *cis* | 0 | 0.0 |
| G-A 56 bS *trans* | 8 | 0.4 |
| G-G 5 aW *cis* | 0 | 0.0 |
| G-G 5 aW *trans* | 1 | 0.0 |
| G-G 6 aW *cis* | 5 | 0.2 |
| G-G 6 aW *trans* | 1 | 0.0 |
| G-G 56 aW *cis* | 0 | 0.0 |
| G-G 56 aW *trans* | 0 | 0.0 |
| G-G 5 aH *cis* | 4 | 0.2 |
| G-G 5 aH *trans* | 0 | 0.0 |
| G-G 6 aH *cis* | 8 | 0.4 |
| G-G 6 aH *trans* | 2 | 0.1 |
| G-G 56 aH *cis* | 2 | 0.1 |
| G-G 56 aH *trans* | 0 | 0.0 |
| G-G 5 aS *cis* | 2 | 0.1 |
| G-G 5 aS *trans* | 0 | 0.0 |
| G-G 6 aS *cis* | 1 | 0.0 |
| G-G 6 aS *trans* | 0 | 0.0 |
| G-G 56 aS *cis* | 0 | 0.0 |
| G-G 56 aS *trans* | 0 | 0.0 |
| G-G 5 bW *cis* | 3 | 0.1 |
| G-G 5 bW *trans* | 2 | 0.1 |
| G-G 6 bW *cis* | 3 | 0.1 |
| G-G 6 bW *trans* | 0 | 0.0 |
| G-G 56 bW *cis* | 0 | 0.0 |
| G-G 56 bW *trans* | 0 | 0.0 |
| G-G 5 bH *cis* | 22 | 1.0 |
| G-G 5 bH *trans* | 2 | 0.1 |
| G-G 6 bH *cis* | 32 | 1.5 |
| G-G 6 bH *trans* | 3 | 0.1 |
| G-G 56 bH *cis* | 0 | 0.0 |
| G-G 56 bH *trans* | 0 | 0.0 |
| G-G 5 bS *cis* | 8 | 0.4 |
| G-G 5 bS *trans* | 0 | 0.0 |
| G-G 6 bS *cis* | 7 | 0.3 |
| G-G 6 bS *trans* | 0 | 0.0 |
| G-G 56 bS *cis* | 0 | 0.0 |
| G-G 56 bS *trans* | 0 | 0.0 |

**Table S12.** Assignment of the identified T-shaped combinations into 12 geometric families.

| **Geometric Family** | **Purine-Purine** | **Purine-Pyrimidine** | **Pyrimidine-Purine** | **Pyrimidine-Pyrimidine** |
| --- | --- | --- | --- | --- |
| aW *cis* | 36 | 47 | 81 | 17 |
| aW *trans* | 27 | 23 | 42 | 7 |
| aH *cis* | 145 | 53 | 32 | 58 |
| aH *trans* | 77 | 34 | 13 | 16 |
| aS *cis* | 422 | 1 | 36 | 1 |
| aS *trans* | 119 | 0 | 45 | 0 |
| bW *cis* | 103 | 34 | 27 | 16 |
| bW *trans* | 18 | 2 | 6 | 8 |
| bH *cis* | 554 | 113 | 95 | 157 |
| bH *trans* | 34 | 27 | 71 | 4 |
| bS *cis* | 139 | 0 | 9 | 0 |
| bS *trans* | 459 | 0 | 53 | 0 |

**Table S13.** Distribution of nucleobase combinations of T-shaped interactions in terms of different classification attributes.

| **Attribute** | | **Purine-Purine** | | **Purine-Pyrimidine** | | **Pyrimidine-Purine** | | **Pyrimidine-Pyrimidine** | |
| --- | --- | --- | --- | --- | --- | --- | --- | --- | --- |
| **Count** | **%** | **Count** | **%** | **Count** | **%** | **Count** | **%** |
| **Face** | **a** | 825 | 38.7 | 158 | 47.3 | 249 | 48.7 | 99 | 34.9 |
| **b** | 1307 | 61.3 | 176 | 52.7 | 262 | 51.3 | 185 | 65.1 |
| **Edge** | **W** | 183 | 8.6 | 107 | 32.0 | 156 | 30.5 | 48 | 16.9 |
| **H** | 810 | 38.0 | 227 | 68.0 | 212 | 41.5 | 235 | 82.7 |
| **S** | 1139 | 53.4 | 1 | 0.3 | 143 | 28.0 | 1 | 0.4 |
| **Glycosidic Orientation** | ***cis*** | 1399 | 65.6 | 248 | 74.3 | 281 | 55.0 | 249 | 87.7 |
| ***trans*** | 733 | 34.4 | 86 | 25.7 | 230 | 45.0 | 35 | 12.3 |
| **Interacting Horizontal Ring** | **5** | 1131 | 53.0 | 165 | 49.4 | − | − | − | − |
| **6** | 976 | 45.8 | 159 | 47.6 | 511 | 100.0 | 284 | 100.0 |
| **56** | 25 | 1.2 | 10 | 3.0 | − | − | − | − |
| **Total Theoretical Possibilities Spanned** | | **86/144** | | **51/144** | | **37/48** | | **25/48** | |
| **199/384** | | | | | | | |

**Table S14.** Most common T-shaped combinations (> 100 occurrences).

| **Combination** | **Frequency** | **%(Purine-Purine)** | **% (all interactions)** |
| --- | --- | --- | --- |
| A(6)-G(C8) bH *cis* | 281 | 13.2 | 8.6 |
| A(5)-A(N3) aS *cis* | 251 | 11.8 | 7.7 |
| A(5)-G(N3) bS *trans* | 251 | 11.8 | 7.7 |
| G(5)-A(N7) bH *cis* | 105 | 4.9 | 3.2 |

| **Modified base** | **T-shaped interaction type** | **occurrences** |
| --- | --- | --- |
| 1-methyladenine (1MA) | 1MA-A 5 S(N3)b | 37 |
| Pseudouridine (PSU) | PSU-A 5 W(N3)a | 1 |
| PSU-U 6 aH(C5) | 1 |

**Table 15.** Occurrence of T-shaped interactions involving modified bases in the RNA dataset.

**Table 16.** List of T-shaped interactions involving modified bases in the RNA dataset.

| Modified base | T-shaped interaction | Resolution (Å) |
| --- | --- | --- |
| PSU | PSU32-U33 6 aH(C5)_4w2f | 2.4 |
| PSU55-A58 5 W(N3)a_5j4b | 2.6 |
| 1MA | 1MA628-A630 5 S(N3)b_1s72 | 2.4 |
| 1MA628-A630 5 S(N3)b_1vq4 | 2.7 |
| 1MA628-A630 5 S(N3)b_1vq5 | 2.6 |
| 1MA628-A630 5 S(N3)b_1vq6 | 2.7 |
| 1MA628-A630 5 S(N3)b_1vq7 | 2.5 |
| 1MA628-A630 5 S(N3)b_1vq8 | 2.2 |
| 1MA628-A630 5 S(N3)b_1vq9 | 2.4 |
| 1MA628-A630 5 S(N3)b_1vqk | 2.3 |
| 1MA628-A630 5 S(N3)b_1vql | 2.3 |
| 1MA628-A630 5 S(N3)b_1vqm | 2.3 |
| 1MA628-A630 5 S(N3)b_1vqn | 2.4 |
| 1MA628-A630 5 S(N3)b_1vqo | 2.2 |
| 1MA628-A630 5 S(N3)b_1vqp | 2.3 |
| 1MA628-A630 5 S(N3)b_1yhq | 2.4 |
| 1MA628-A630 5 S(N3)b_1yi2 | 2.7 |
| 1MA628-A630 5 S(N3)b_1yij | 2.6 |
| 1MA628-A630 5 S(N3)b_1yj9 | 2.8 |
| 1MA628-A630 5 S(N3)b_1yjn | 3.0 |
| 1MA628-A630 5 S(N3)b_1yjw | 2.9 |
| 1MA628-A630 5 S(N3)b_2otj | 2.9 |
| 1MA628-A630 5 S(N3)b_2otl | 2.7 |
| 1MA628-A630 5 S(N3)b_2qex | 2.9 |
| 1MA628-A630 5 S(N3)b_3cc4 | 2.7 |
| 1MA628-A630 5 S(N3)b_3cc7 | 2.7 |
| 1MA628-A630 5 S(N3)b_3cce | 2.8 |
| 1MA628-A630 5 S(N3)b_3ccj | 3.3 |
| 1MA628-A630 5 S(N3)b_3ccl | 2.9 |
| 1MA628-A630 5 S(N3)b_3ccm | 2.6 |
| 1MA628-A630 5 S(N3)b_3ccq | 2.9 |
| 1MA628-A630 5 S(N3)b_3ccs | 3.0 |
| 1MA628-A630 5 S(N3)b_3ccv | 2.9 |
| 1MA628-A630 5 S(N3)b_3cma | 2.8 |
| 1MA628-A630 5 S(N3)b_3cme | 3.0 |
| 1MA628-A630 5 S(N3)b_3g6e | 2.7 |
| 1MA628-A630 5 S(N3)b_3g71 | 2.9 |
| 1MA628-A630 5 S(N3)b_3i55 | 3.1 |
| 1MA628-A630 5 S(N3)b_4v9f | 2.4 |

**Table S17.** Distribution of different sequence combinations of T-shaped interactions in terms of the relative position of the interacting nucleotides in the sequence space.

| **Base** | **All Interactions** | | | | | | **Nonredundant Interactions** | | | | | |
| --- | --- | --- | --- | --- | --- | --- | --- | --- | --- | --- | --- | --- |
| **Consecutive** | | **Non-Consecutive** | | **Inter-RNA** | | **Consecutive** | | **Non-Consecutive** | | **Inter-RNA** | |
| **Count** | **%** | **Count** | **%** | **Count** | **%** | **Count** | **%** | **Count** | **%** | **Count** | **%** |
| A-A | 109 | 3.3 | 700 | 21.5 | 18 | 0.6 | 61 | 6.6 | 114 | 12.4 | 13 | 1.4 |
| A-C | 52 | 1.6 | 40 | 1.2 | 0 | 0.0 | 24 | 2.6 | 15 | 1.6 | 0 | 0.0 |
| A-G | 39 | 1.2 | 326 | 10 | 0 | 0.0 | 28 | 3.0 | 31 | 3.4 | 0 | 0.0 |
| A-U | 29 | 0.9 | 63 | 1.9 | 1 | 0.0 | 17 | 1.8 | 28 | 3.0 | 1 | 0.1 |
| C-A | 128 | 3.9 | 117 | 3.6 | 3 | 0.1 | 40 | 4.3 | 26 | 2.8 | 3 | 0.3 |
| C-C | 54 | 1.7 | 8 | 0.2 | 0 | 0.0 | 38 | 4.1 | 6.0 | 0.7 | 0 | 0.0 |
| C-G | 28 | 0.9 | 27 | 0.8 | 0 | 0.0 | 18 | 2.0 | 13 | 1.4 | 0 | 0.0 |
| C-U | 66 | 2 | 11 | 0.3 | 0 | 0.0 | 23 | 2.5 | 7.0 | 0.8 | 0 | 0.0 |
| G-A | 288 | 8.8 | 481 | 14.8 | 63 | 1.9 | 56 | 6.1 | 63 | 6.8 | 6 | 0.7 |
| G-C | 38 | 1.2 | 44 | 1.3 | 0 | 0.0 | 25 | 2.7 | 23 | 2.5 | 0 | 0.0 |
| G-G | 79 | 2.4 | 26 | 0.8 | 3 | 0.1 | 42 | 4.6 | 18 | 2.0 | 3 | 0.3 |
| G-U | 42 | 1.3 | 25 | 0.8 | 0 | 0.0 | 26 | 2.8 | 13 | 1.4 | 0 | 0.0 |
| U-A | 47 | 1.4 | 124 | 3.8 | 1 | 0.0 | 21 | 2.3 | 31 | 3.4 | 1 | 0.1 |
| U-C | 41 | 1.3 | 41 | 1.3 | 0 | 0.0 | 22 | 2.4 | 14 | 1.5 | 0 | 0.0 |
| U-G | 17 | 0.5 | 15 | 0.5 | 4 | 0.1 | 12 | 1.3 | 6 | 0.7 | 2 | 0.2 |
| U-U | 39 | 1.2 | 23 | 0.7 | 1 | 0.0 | 21 | 2.3 | 10 | 1.1 | 1 | 0.1 |
| **Total** | **1096** | | **2071** | | **94** | | **474** | | **418** | | **30** | |
| **%** | **33.6%** | | **63.5%** | | **2.9%** | | **51.4%** | | **45.3%** | | **3.3%** | |

**Table S18.** Comparison of the contribution of consecutive, non-consecutive and inter-RNA categories in stacking and T-shaped interactions.

| **Position** | **Stacking** | **T-shaped** |
| --- | --- | --- |
| *non-consecutive* | 24.2% | 63.5% |
| *consecutive* | 75.6% | 33.6% |
| *inter-RNA* | 0.1% | 2.9% |

**Table S19.** Top four most common nonredundant T-shaped interactions.

| **Combination** | **Type** | **Frequency** | **%(Purine-Purine)** | **% (all interactions)** |
| --- | --- | --- | --- | --- |
| G573-A571 5 bS(N3) *trans* | 50S/70Sribosome | 204 | 9.6 | 6.3 |
| A1755-G1758 6 bH(C8-H) *cis* | 70Sribosome | 157 | 7.4 | 4.8 |
| A975-A1357 5 aS(C2-H) *cis* | 30S/70Sribosome | 80 | 3.8 | 2.5 |
| G389-A390 5 bH(N7) *cis* | 70Sribosome | 69 | 3.2 | 2.1 |

**Table S20.** Conservation of T-shaped interactions appearing in more than 50% of PDBs (column 4) across different species.

| **RNA type** | **Residues** | **Organism** | **% of PDBs containing T-shaped contact** | **Characteristics of the identified T-shaped contact** | | | |
| --- | --- | --- | --- | --- | --- | --- | --- |
| **Sequence** | **Face, edge, glycosidic orientation** | **Interacting ring of the horizontal base** | **Interacting group of the vertical base** |
| 23S rRNA | 10-532 | *Haloarcula marismortui* | 58.2% | U-A (100%) | bH *trans* (100%) | 6-membered (100%) | N7 (100%) |
| 630-628 | *Haloarcula marismortui* | 71.6% | A-m1A (76.6%)  A-A (23.4%) | bS *trans* (100%) | 5-membered (100%) | N3 (100%) |
| 1811-1814 | *Haloarcula marismortui* | 85.1% | A-G (100%) | bH *cis* (100%) | 6-membered (98.2%)  5-membered (1.8%) | C8-H (100%) |
| 573-571 | *Thermus thermophilus* | 86.1% | G-A (100%) | bS *trans* (99.0%)  bS *cis* (1.0%) | 5-membered (78.7%)  6-membered (18.6%)  5,6-membered (2.7%) | N3 (98.8%)  C2 (1.2%) |
| *Escherichia coli* | 7.1% | G-A (100%) | bS *trans* (100%) | 5-membered (100%) | N3 (100%) |
| *Deinococcus radiodurans* | 3.6% | G-A (100%) | bS *trans* (100%) | 5-membered (100%) | N3 (100%) |
| 1755-1758 | *Thermus thermophilus* | 59.3% | A-G (100%) | bH *cis* | 6-membered (96.3%)  5-membered (3.7%) | C8-H |
| *Escherichia coli* | 50.0% | A-U (100%) | bH *cis* (85.7%)  bW *cis* (14.3%) | 6-membered (100%) | C5-H (85.7%)  N3-H (9.5%)  O2 (4.8%) |
| 16S rRNA | 975-1357  975-1357 | *Escherichia coli* | 66.7% | A-A (100%) | bS *trans* (77.1%)  aS *cis* (14.6%)  aS *trans* (8.3%) | 5-membered (83.3%)  6-membered (16.7%) | N3 (79.2%)  C2-H (20.8%) |
| *Thermus thermophilus* | 63.0% | A-A (100%) | aS *cis* (97.6%)  aS *trans* (2.4%) | 5-membered (91.3%)  6-membered (8.7%) | C2-H (63.0%)  N3 (37.0%) |
| 28S rRNA | 1390-219 | *Saccharomyces cerevisiae* | 69.4% | A-A (100%) | aH *trans* (100%) | 5-membered (100%) | C8-H (100%) |
| 590-589 | *Saccharomyces cerevisiae* | 69.4% | G-A (100%) | aH *cis* (100%) | 5-membered (100%) | C8-H (83.3%)  N7 (16.7%) |
| 3246-3245 | *Saccharomyces cerevisiae* | 61.1% | G-A (100%) | aH *cis* (100%) | 6-membered (91.4%)  5-membered (4.3%)  5,6-membered (4.3%) | N7 (100%) |
| 18S rRNA | 346-323 | *Saccharomyces cerevisiae* | 77.8% | G-A (100%) | aS *trans* (100%) | 6-membered (100%) | C2-H (91.9%)  N3 (8.1%) |
|  | 1026-1790 | *Saccharomyces cerevisiae* | 77.8% | A-A (100%) | bS *cis* (100%) | 6-membered (100%) | N3 (100%) |
